# Supplementary material
Source: PubMed Central journal article supplement (PMC7965100)
Supplement: 3195_table.pdf [file 3195_table.pdf]

**On-line Table: Overview of demographics of stent retriever and Merci retriever cohorts<sup>a</sup>**

|                                   | Stent Retriever                       | Merci                               | <i>P</i> Value     |
|-----------------------------------|---------------------------------------|-------------------------------------|--------------------|
| No. of patients                   | 51% (62/122)                          | 49% (60/122)                        | .80                |
| Age (yr) (range)                  | 68 (26–89)                            | 65 (27–90)                          | .19                |
| Sex (male, female)                | (58%, 42%)                            | (50%, 50%)                          | .46                |
| Occlusion                         |                                       |                                     |                    |
| BA                                | 13% (8/62)                            | 25% (15/60)                         | .09                |
| MCA                               | 58% (36/62)                           | 62% (37/60)                         | .69                |
| ICA and MCA                       | 29% (18/62)                           | 13% (8/60)                          | .036 <sup>b</sup>  |
| Admission                         |                                       |                                     |                    |
| Mean NIHSS score (range)          | 17 (6–26)                             | 17 (4–26)                           | .95                |
| Duration to treatment (range)     | 3 hrs, 30 min (40 min–10 hrs, 30 min) | 4 hrs, 26 min (1 hr, 55 min–16 hrs) | .24                |
| Unclear symptom onset             | 18% (11/62)                           | 8% (5/60)                           | .12                |
| TICI before treatment             |                                       |                                     |                    |
| TICI 1                            | 100%                                  | 100%                                | 1.0                |
| TICI after treatment              |                                       |                                     |                    |
| TICI 1                            | 8% (5/62)                             | 17% (10/60)                         | .15                |
| TICI 2a                           | 10% (6/62)                            | 22% (13/60)                         | .07                |
| TICI 2b                           | 29% (18/62)                           | 32% (19/60)                         | .75                |
| TICI 3                            | 53% (33/62)                           | 30% (18/60)                         | .016 <sup>a</sup>  |
| Intracranial hemorrhage           | 40% (25/62)                           | 55% (33/60)                         | .1                 |
| Severe ICH                        | 10% (6/62)                            | 28% (17/60)                         | .01 <sup>b</sup>   |
| Mild or moderate ICH              | 31% (19/62)                           | 27% (16/60)                         | .63                |
| Discharge                         |                                       |                                     |                    |
| Mean NIHSS score (range)          | 10 (2–26)                             | 14 (2–28)                           | .004 <sup>b</sup>  |
| mRS 0–2                           | 37% (23/62)                           | 13% (8/60)                          | .003 <sup>b</sup>  |
| mRS 3–5                           | 55% (34/62)                           | 65% (39/60)                         | .25                |
| mRS 6                             | 8% (5/62)                             | 22% (13/60)                         | .033 <sup>b</sup>  |
| 90 days                           |                                       |                                     |                    |
| Lost                              | 2% (1/57)                             | 6% (3/47)                           |                    |
| Deceased                          | 2% (1/56)                             | 9% (4/44)                           | .12                |
| Mean NIHSS score (range)          | 7.1 (0–23)                            | 9.4 (0–20)                          | .08                |
| mRS 0–2                           | 59% (36/61)                           | 25% (14/57)                         | <.0003             |
| mRS 3–5                           | 31% (19/61)                           | 46% (26/57)                         | .13                |
| mRS 6                             | 10% (6/61)                            | 30% (17/57)                         | <.01               |
| Mean treatment time (min) (range) | 72 (10–166)                           | 122 (55–200)                        | <.001 <sup>b</sup> |
| Only EMR                          | 16% (10/62)                           | 5% (3/60)                           | .12                |
| DAC used                          | 26% (16/62)                           | 30% (18/60)                         | .62                |
| Procedure passes (range)          | 2.5 (1–6)                             | 3.3 (1–10)                          | .003               |
| Additionally therapies            |                                       |                                     |                    |
| IAT                               | 15% (9/62)                            | 27% (16/60)                         | .09                |
| IVT                               | 42% (26/62)                           | 13% (8/60)                          | .0006 <sup>b</sup> |
| IVT and IAT                       | 27% (17/62)                           | 55% (33/60)                         | .002 <sup>b</sup>  |

<sup>a</sup> Percentages are rounded to full integers.<sup>b</sup> Marked *P* values indicate a statistically significant difference between both groups.
